# Supplementary material for: The Mycotoxin Deoxynivalenol Predisposes for the Development of Clostridium perfringens-Induced Necrotic Enteritis in Broiler Chickens
Source: PubMed Central journal article supplement (PMC4182565; doi:10.1371/journal.pone.0108775), 2014-09-30
Supplement: pone.0108775.s002.pdf [file pone.0108775.s002.pdf]

**Table S2: Primer sequences used for qRT-PCR transcription analysis of *netB* toxin.** Sequences are presented from 5' to 3'.

| <b>target</b> | <b>forward primer</b>               | <b>reverse primer</b>               | <b>analysis</b> | <b>size (nt) of amplified products</b> |
|---------------|-------------------------------------|-------------------------------------|-----------------|----------------------------------------|
| <i>netB</i>   | TGA TAC CGC TTC ACA TAA AGG T       | ACC GTC CTT AGT CTC AAC AAA T       | standard PCR    | 448                                    |
| <i>netB</i>   | TCA ATT GGT TAT TCT ATA GGC GGT A   | ATA TGA AGC ATT TAT TCC AGC ACC A   | qPCR            | 75                                     |
| <i>rpoA</i>   | ACA TCA TTA GCG TTG TCA GTT AAA G   | GAG GTT ATG GAA TAA CTC TTG GTA ATG | standard PCR    | 613                                    |
| <i>rpoA</i>   | CCA TCT GTT TTT ATA TCT GCT CCA GTA | GGA AGG TGA AGG ACC AAA AAC TAT T   | qPCR            | 81                                     |
